# Supplementary material for: Independent mode sorption of perfluoroalkyl acids by single and multiple adsorbents
Source: Royal Society of Chemistry journal article supplement (doi:10.1039/d1em00322d), 2021-01-01
Supplement: d1em00322d1.pdf [file d1em00322d1.pdf]

## Supporting information

### **Independent mode sorption of perfluoroalkyl acids by single and multiple adsorbents**

Hildo Krop,<sup>a</sup> Christian Eschauzier,<sup>b</sup> Els van der Roest,<sup>c</sup> John R. Parsons,<sup>c</sup> Pim de Voogt<sup>c,d</sup>

\*Corresponding author: [hkrop@outlook.com](mailto:hkrop@outlook.com)

<sup>a</sup> Krop-Consult, Conradstraat 7, 1505 KA Zaandam

<sup>b</sup> Eschauzier Water Management, Trouwringhstraat 18-1, 1055HB Amsterdam, The Netherlands

<sup>c</sup> Institute for Biodiversity and Ecosystem Dynamics, University of Amsterdam, Science Park 904, 1098 XH Amsterdam, Netherlands-

<sup>d</sup> KWR Water Research Institute, P.O. Box 1072, 3430 BB Nieuwegein, Netherlands.

## I. Mass transitions applied in the MS/MS

| Compound           | Q1 mass | Q3 mass | Transition |
|--------------------|---------|---------|------------|
| PFBA               | 213     | 169     | 1          |
| PFPA               | 263     | 219     | 1          |
| PFH <sub>x</sub> A | 313     | 269     | 1          |
|                    | 313     | 119     | 2          |
| PFHpA              | 363     | 319     | 1          |
|                    | 363     | 169     | 2          |
| PFOA               | 413     | 369     | 1          |
|                    | 413     | 169     | 2          |
| PFNA               | 463     | 419     | 1          |

**Table SI.1** Mass transitions of the PFAAs for the tandem mass spectrometer

## II. Dead volume measurements

The dead volumes were obtained with different compounds which would not be expected to have interaction with the sorbent. The apex of the chromatograms were taken as the dead volume ( $t_0$ ). In this table the different sorbents with the corresponding dead volumes and testing compounds are showed.

|                                | Dead volume<br>( $t_0$ , min) | Test compound      |
|--------------------------------|-------------------------------|--------------------|
| C18                            | 2.8                           | acetone/thiourea   |
| WAX                            | 0.24                          | metformin          |
| MAX                            | 0.257                         | metformin          |
| HLB                            | 0.434                         | metformin/thiourea |
| Al <sub>2</sub> O <sub>3</sub> | 0.26                          | metformin          |

**Table SI.2** Dead volume of the columns used with corresponding test compounds.

### III Peaks and graphs of $\ln K_D$ vs different methanol fractions for the columns and observed $R^2$ for each adsorbent

Figure SI.3.1 shows the peak shapes at different  $\phi$ MeOH in the vials on the sorbent: C18.

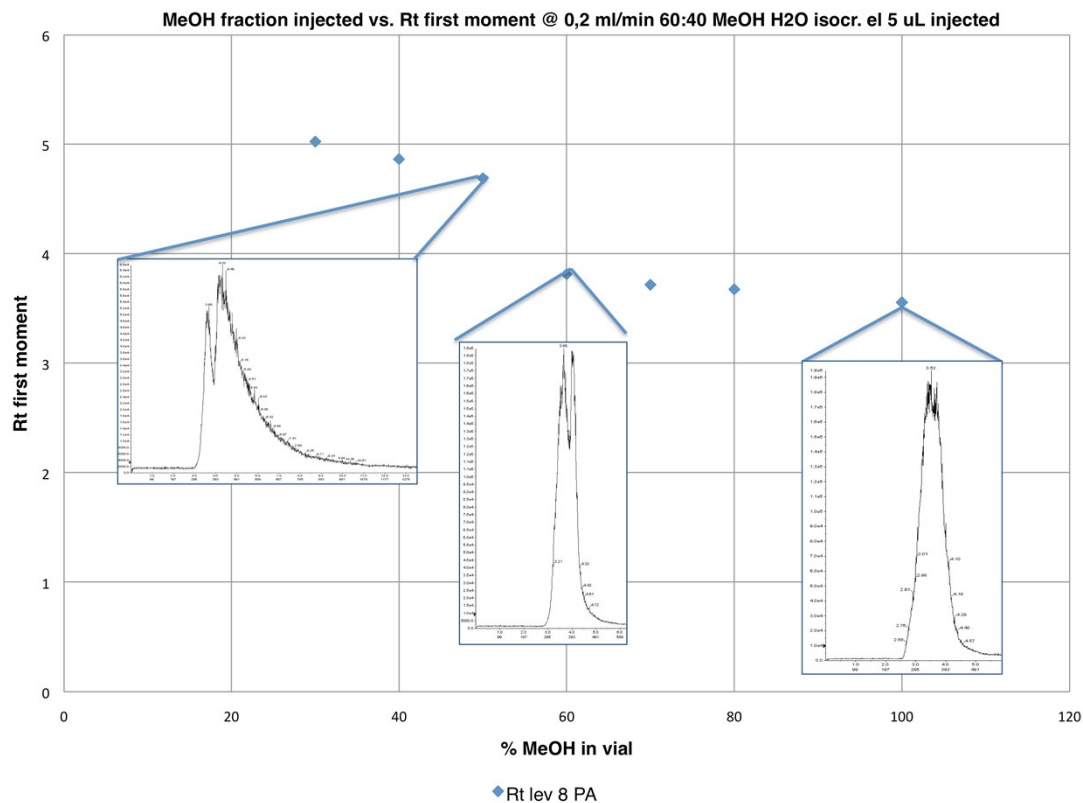

**Fig. SI.3.1:** Graph of retention time vs  $\phi$ MeOH in vial for C18, PFPA, with some peak shapes.

The retention time first moment ( $t_R$ ) takes into account the peak shape because the centre of mass of the peak is used instead of the time that corresponds to the highest signal (apex). The %MeOH of the flow varied between 0.4-0.8.

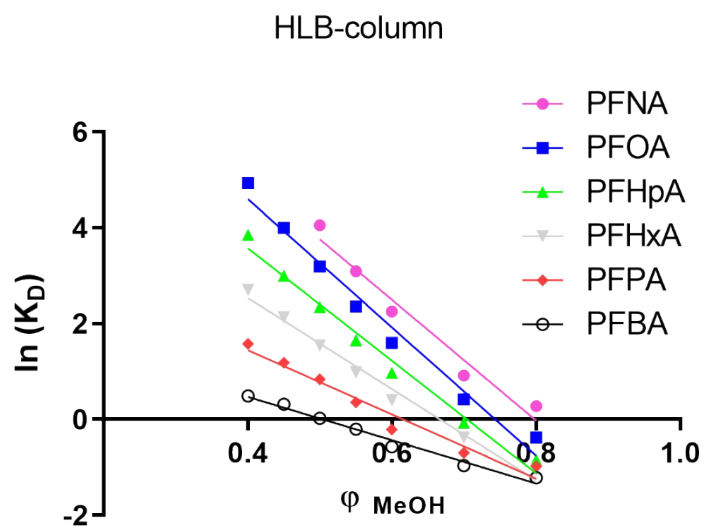

**Fig. SI.3.2** Plots of the linear relationship between  $\ln K_D$  and  $\phi_{MeOH}$  for the HLB sorbent.

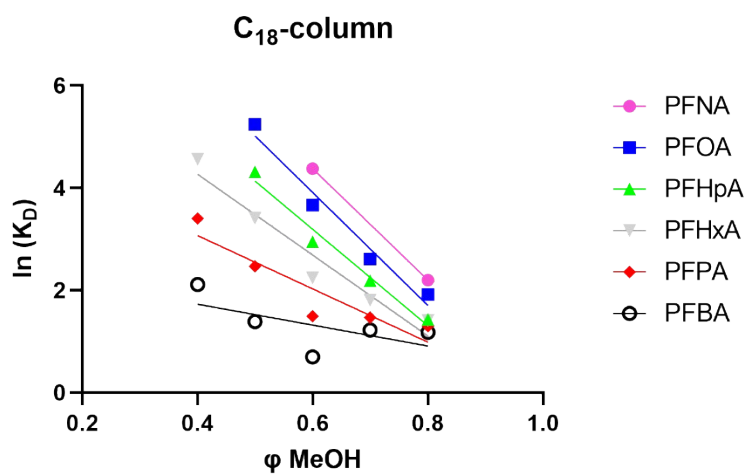

**Fig. SI.3.3** Plots of the linear relationship between  $\ln K_D$  and  $\phi_{MeOH}$  for the C18-column

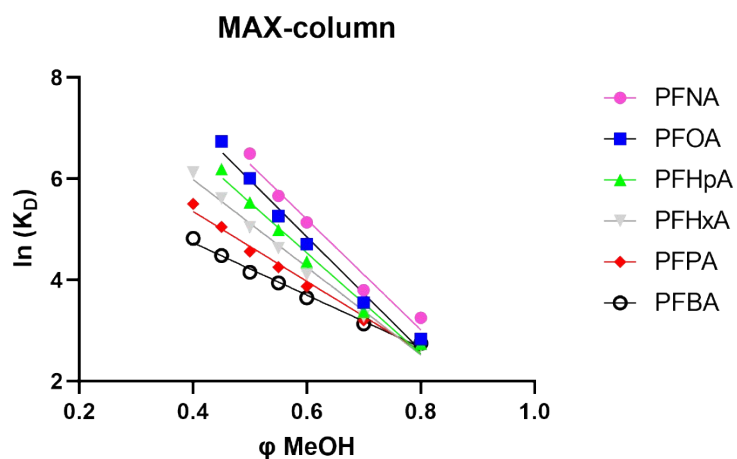

**Fig. SI.3.4** Plots of the linear relationship between  $\ln K_D$  and  $\phi_{MeOH}$  for the MAX-sorbent

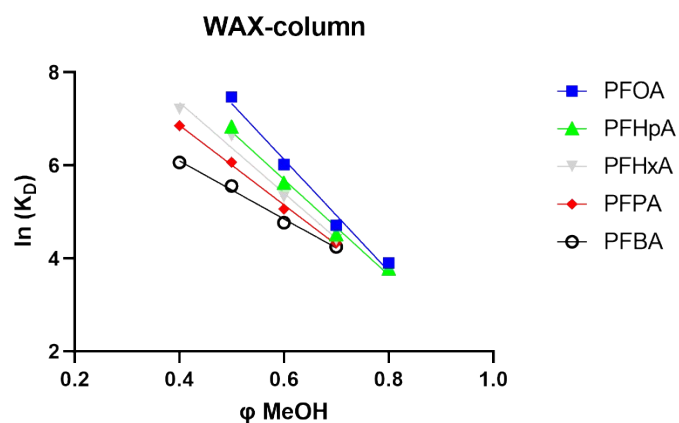

**Fig. SI.3.5** Plots of the linear relationship between  $\ln K_D$  and  $\phi_{MeOH}$  for the WAX-sorbent

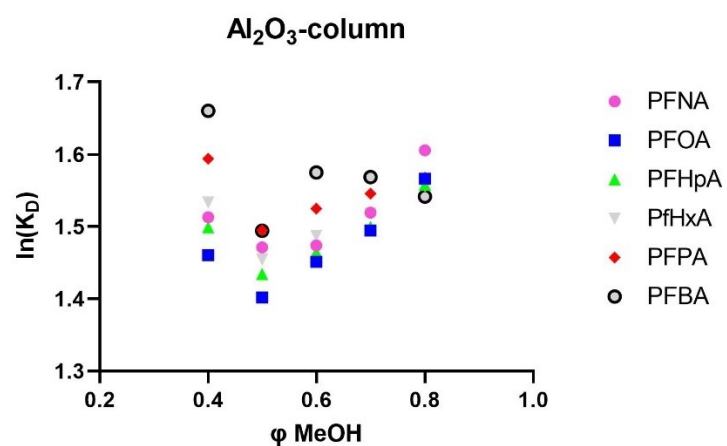

**Fig. SI.3.6** Data plots between  $\ln K_D$  and  $\phi_{MeOH}$  for the  $Al_2O_3$ -sorbent

|       | $R^2$  |       |       |        |                                |
|-------|--------|-------|-------|--------|--------------------------------|
|       | C18    | HLB   | WAX   | MAX    | Al <sub>2</sub> O <sub>3</sub> |
| PFBA  | 0.396  | 0.982 | 0.991 | 0.9712 | 0.180                          |
| PFPA  | 0.844  | 0.961 | 0.996 | 0.9846 | 6*10 <sup>-5</sup>             |
| PFHxA | 0.940  | 0.986 | 0.980 | 0.9856 | 0.184                          |
| PFHpA | 0.975  | 0.984 | 0.998 | 0.9891 | 0.393                          |
| PFOA  | 0.9683 | 0.979 | 0.984 | 0.9865 | 0.622                          |
| PFNA  |        | 0.964 |       | 0.9923 | 0.460                          |

**Table SI.3.1**  $R^2$  values for the extrapolation to 100% water for all adsorbents.

| PFAA  | $\Delta_s G^0$ (kJ/mol) |          |          |          |                                |
|-------|-------------------------|----------|----------|----------|--------------------------------|
|       | C <sub>18</sub>         | HLB      | WAX      | MAX      | Al <sub>2</sub> O <sub>3</sub> |
| PFBA  | -6.1±3.8                | -5.4±2.8 | -20±1.0  | -16±0.31 | -4.0±0.35                      |
| PFPeA | -13±2.7                 | -9.8±1.3 | -25±0.88 | -19±0.54 | -3.7±0.34                      |
| PFHxA | -18±2.2                 | -15±1.0  | -27±2.3  | -23±0.61 | -3.4±0.32                      |
| PFHpA | -21±3.4                 | -20±0.76 | -28±2.2  | -25±1.0  | -3.3±0.32                      |
| PFOA  | -25±3.8                 | -24±0.91 | -32±3.0  | -28±1.2  | -3.1±0.34                      |
| PFNA  |                         | -24±0.41 |          | -28±2.2  | -3.3±0.48                      |

**Table SI.3.2.** Absolute values of  $\Delta_s G^0$  (kJ/mol) for the different PFAAs and adsorbents tested

#### IV. Structure and possible interaction locations between the adsorbents investigated and a PFAA moiety

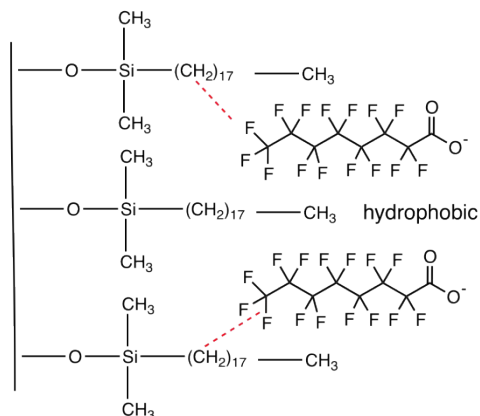

Figure SI.4.1 C<sub>18</sub> material

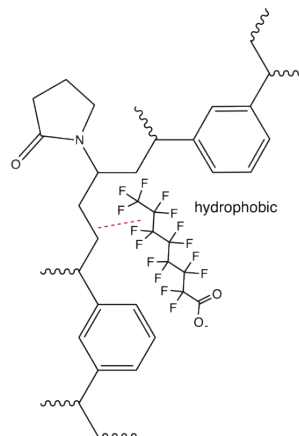

Figure SI.4.2 HLB structure

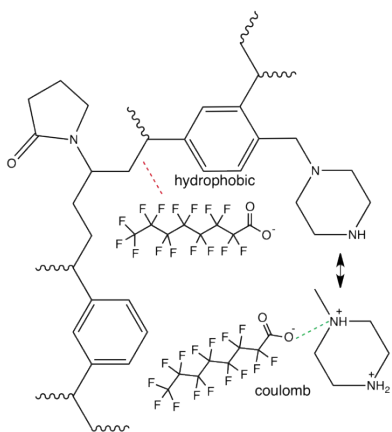

Figure SI.4.3 WAX material.

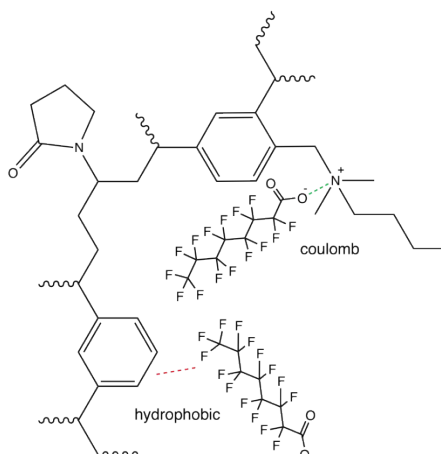

Figure SI.4.4 OASIS MAX structure

## V. Derivation of relative contribution of PFAAs adsorbed on WAX and HLB when mixed together

For a system with two adsorbents present in a liquid the total mass of single adsorbate,  $m_{tot}$  (nmol), and total volume,  $V_{tot}$ , are defined as follows:

$$m_{tot} = m_{A1} + m_{A2} + m_{aq} \quad (A1)$$

where  $m_A$  is the mass of the adsorbate sorbed to the specific sediment and  $m_{aq}$  is the mass dissolved in the liquid at equilibrium and

$$V_{tot} = V_w + \rho_{S1} * m_{S1} + \rho_{S2} * m_{S2} \quad (A2)$$

where  $\rho_s$  is the specific volume of the mass (L/kg),  $m_s$  the mass of the sediment applied (e.g. g) and  $V_w$  the volume of the liquid applied (L).

Multiplying  $m_A$  in eq A1 by  $m_s/m_s$  where  $m_s$  is the mass of the sediment (g) for each specific adsorbent leads to Eq A3.

$$m_{tot} = \frac{m_{A1}}{m_{S1}} * m_{S1} + \frac{m_{A2}}{m_{S2}} * m_{S2} + m_{aq} \quad (A3)$$

We consider the mass applied in the experimentally defined system as a fraction,  $f_s$ , multiplied by the mass normalization factor,  $M_s$  (eq A4)

$$m_s = f_s * M_s \quad (A4)$$

Using eq A3 and eq A4 for each specific adsorbent leads to Eq A5

$$m_{tot} = \frac{m_{A1}}{M_{S1}} * M_{S1} + \frac{m_{A2}}{M_{S2}} * M_{S2} + m_{aq} \quad (A5)$$

In Eq 5  $m_A/M_S$  is the thermodynamic adsorbed fraction,  $C_s^{therm}$ . Multiplying the right side of A5 with  $V_{tot}/V_{tot}$  leads to Eq A6

$$m_{tot} = \left[ \frac{C_{S1}^{therm} * M_{S1}}{V_{tot}} + \frac{C_{S2}^{therm} * M_{S2}}{V_{tot}} + \frac{m_{aq}}{V_{tot}} \right] * V_{tot} \quad (A6)$$

The following assumption are introduced;  $C_s^{therm} = K_{p,0}^S * C_w^{therm}$  which is related to the linear part of the Langmuir sorption isotherm where the number of adsorbed moieties is still small compared to the overall number of sorption locations, and  $V_w \gg \rho_{S1} * m_{S1}$  and  $V_w \gg \rho_{S2} * m_{S2} \rightarrow V_{tot} \approx V_w$  meaning that the volume of the water is very large compared to the volumes of the adsorbents in the system. It leads to Eq (A7)

$$m_{tot} = \left[ \frac{K_{p,0}^{S1} * C_w^{therm} * M_{S1}}{V_w} + \frac{K_{p,0}^{S2} * C_w^{therm} * M_{S2}}{V_w} + \frac{m_{aq}}{V_w} \right] * V_w \quad (A7)$$

In Eq A7  $m_{aq}/V_w$  is equivalent to  $C_w^{therm}$  and rearranging  $C_w^{therm}$  leads to Eq (A8)

$$m_{tot} = C_w^{therm} \left[ \frac{K_{p,0}^{S1} * M_{S1}}{V_w} + \frac{K_{p,0}^{S2} * M_{S2}}{V_w} + 1 \right] * V_w \quad (A8)$$

If we normalize  $M_S$  on 1 kg and  $V_w$  on 1L as is normally done in sorption experiments Eq A9 is derived.

$$C_w^{therm} = \frac{m_{tot}/1L}{\left[ K_{p,0}^{S1} * \frac{1kg}{1L} + K_{p,0}^{S2} * \frac{1kg}{1L} + 1 \right]} = \frac{m_{tot}}{[K_{p,0}^{S1} + K_{p,0}^{S2} + 1]} \quad (A9)$$

If Eq A4 is not applied then the experiment is conducted with specific masses of the sediment and volume of the liquid but the same assumptions are still valid (linear sorption isotherm and  $V_w \gg \rho_{S1} * m_{s1}$  and  $V_w \gg \rho_{S2} * m_{s2}$ ) the following equation for  $C_w^{therm}$  is obtained (Eq A10).

$$C_w^{therm} = \frac{m_{tot}}{\left[ \frac{K_{p,0}^{S1} * m_{S1}}{V_w} + \frac{K_{p,0}^{S2} * m_{S2}}{V_w} + 1 \right] * V_w} \quad (A10)$$

In this case  $m_s/V_w$  is equivalent to the sediment concentration in the liquid,  $S_{aq}$  leading to Eq A11. If  $K_{p,0}^S$  is expressed in L/kg then  $S_{aq}$  must be expressed in kg/L.

$$C_w^{therm} = \frac{m_{tot}}{[K_{p,0}^{S1} * S_{aq}^{S1} + K_{p,0}^{S2} * S_{aq}^{S2} + 1] * V_w} \quad (A11)$$

This equation is useful for sorption experiments conducted in the lab. If it is assumed that  $S_{aq}$  is normalised to 1 kg/L and  $V_w$  to 1L, Eq A9 returns.

## VI. Fraction of PFAA adsorbed in a *batch* experiment with a mixture of HLB and WAX adsorbents

Using the values  $\Delta_s G^0(0)$  and  $\Delta \Delta_L G^0$  from Table 2 in the main text for HLB and WAX respectively and the relationship  $\Delta_s G^0 = -RT \ln K_{p,0}$  the individual  $K_{p,0}$  values of WAX and HLB can be established. According to the IM model in an experimental system where both adsorbents are present the overall  $K_{p,0}^{elec+hydr}$  can be established as follows  $K_{p,0}^{elec+hydr} = K_{p,0}^{elec} + K_{p,0}^{hydr}$ . Table SI.6.1 shows the results.

|                                      | PFBA    | PFHxA   | PFOA    | PFDA    | PFDoDA  | PFTeDA  | PFHxDA  |
|--------------------------------------|---------|---------|---------|---------|---------|---------|---------|
| $N_{CF2}$                            | 3       | 5       | 7       | 9       | 11      | 13      | 15      |
| $\Delta G_s^0(N_{CF2})$ (HLB) kJ/mol | -6.5    | -14.5   | -22.5   | -30.5   | -38.5   | -46.5   | -54.5   |
| $\Delta G_s^0(N_{CF2})$ (WAX) kJ/mol | -20.5   | -25.5   | -30.5   | -35.5   | -40.5   | -45.5   | -50.5   |
| $K_{p,0}^{hydr}$ (HLB) (L/kg)        | 1.4E+01 | 3.6E+02 | 9.4E+03 | 2.4E+05 | 6.3E+06 | 1.6E+08 | 4.2E+09 |
| $K_{p,0}^{elec}$ (WAX) (L/kg)        | 4.2E+03 | 3.2E+04 | 2.4E+05 | 1.9E+06 | 1.4E+07 | 1.1E+08 | 8.2E+08 |
| $K_{p,0}^{hydr+anionic}$ (L/kg)      | 4.2E+03 | 3.2E+04 | 2.5E+05 | 2.1E+06 | 2.0E+07 | 2.7E+08 | 5.0E+09 |

**Table SI.6.1:** Individual  $K_{p,0}$  value of HLB and WAX and the overall  $K_{p,0}^{anionic+hydr}$  value for several PFAA in the range from  $C_4$  to  $C_{16}$ .  $K_{p,0}$ -values with  $N_{CF2} > 8$  are estimated by assuming that the linearity for each adsorbent as shown in Fig 3 still holds.

Based on the  $K_{p,0}$  values from the individual adsorbents HLB and WAX from table SI.6.1 one can calculate the adsorbed fraction on HLB and WAX individually in a batch experiment with e.g. a starting mass of each PFCA of 100 nmol, volume of the water of 1 L and sediment masses of 0.010 kg each. As a first step the equilibrium concentration of the PFAA in water,  $C_w(t=t_{eq})$ , is calculated according to Eq A12 in section V of this SI. It is assumed that the assumptions in the derivation of Eq A12 are valid in the selected experimental setup. On using the data of Table 1, the 10 g of WAX and HLB in this 1 L can adsorb a maximum of 5.3 mmol and 2.6 mmol PFAA which is far above the applied mass of 100 nmol and therefore easily fulfilling the linear assumption. The relative fractions of each PFAA adsorbed on WAX and HLB,

|                                | PFBA       | PFHxA      | PFOA       | PFDA        | PFDoDA      | PFTetraDA   | PFHexaDA    |
|--------------------------------|------------|------------|------------|-------------|-------------|-------------|-------------|
| $N_{CF2}$                      | 3          | 5          | 7          | 9           | 11          | 13          | 15          |
| $C_w^{eq}$ (nmol/L)            | 2.3E+00    | 3.1E-01    | 4.0E-02    | 4.8E-03     | 4.9E-04     | 3.7E-05     | 2.0E-06     |
| $C_s^{hydr}$ (HLB) (nmol/kg)   | 3.29E-01   | 1.13E+00   | 3.72E+00   | 1.16E+01    | 3.07E+01    | 6.00E+01    | 8.36E+01    |
| $C_s^{anionic}$ (WAX) nmol/kg) | 9.73E+01   | 9.86E+01   | 9.62E+01   | 8.84E+01    | 6.93E+01    | 4.00E+01    | 1.64E+01    |
| $C_s^{total}$ nmol/kg)         | 9.77E+01   | 9.97E+01   | 1.00E+02   | 1.00E+02    | 1.00E+02    | 1.00E+02    | 1.00E+02    |
| $C_s^{hydr}$ HLB (%)           | 0.32859454 | 1.12654127 | 3.72391303 | 11.58250213 | 30.72483452 | 60.02491012 | 83.56231586 |
| $C_s^{anionic}$ WAX (%)        | 97.3239732 | 98.8699514 | 96.2746080 | 88.4169444  | 69.2750148  | 39.9750676  | 16.4376825  |
| $C_s^{total}$ (%)              | 97.6604395 | 99.6896289 | 99.9602997 | 99.9952219  | 99.9995095  | 99.9999629  | 99.9999980  |

respectively, are presented Table SI.6.2.

**Table SI.6.2:** Expected adsorbed fractions of several PFCA to WAX and HLB in a *batch* experiment with starting mass of 100 nmol of each PFAA in 1 L of water and 10 g of HLB and WAX each.  $C_s$  (%) values above  $N_{CF2} > 8$  are estimated by assuming that the linearity for each adsorbent as shown in Fig 3 still holds.
